# PERIVASCULAR ADIPOSE TISSUE: QUANTITATIVE ANALYSIS BY MORPHOMETRY AND STEREOLOGY IN RODENTS

**Running title:** Perivascular adipose tissue morphology

Felipe Demani Carneiro<sup>1</sup>, Stephanie Christinne Sinder Mello<sup>1</sup>, Emiliana Barbosa Marques<sup>2</sup>, Rogerio Barbosa Magalhaes Barros<sup>2</sup>, Christianne Bretas Vieira Scaramello<sup>2</sup>, Caroline Fernandes-Santos<sup>1\*</sup>

<sup>1</sup>Laboratório Multiusuário de Pesquisa Biomédica, Departamento de Ciências Básicas, Universidade Federal Fluminense, Instituto de Saúde de Nova Friburgo, RJ, Brazil.  
<http://www.punf.uff.br/Impb/>

<sup>2</sup>Departamento de Fisiologia e Farmacologia, Universidade Federal Fluminense, RJ, Brazil

\*Corresponding Author: Rua Dr. Silvio Henrique Braune, 22, Centro, Nova Friburgo, RJ, Brazil, 28.625-650, Phone: +55 22 30162331, e-mail: cf\_santos@id.uff.br

## ABSTRACT

*The perivascular adipose tissue (PVAT) provides mechanical support to blood vessels and modulates vascular physiology in obesity. Our goal is to provide a reproductive protocol using morphometric and stereological tools to assess PVAT morphology. The thoracic aorta from male Wistar rats (n=6) and C57BL/6 mice (n=7) underwent routine histological procedures, and two independent observers analyzed the same set of digital images. Agreement and reproducibility were assessed. Both observers showed that the diameter of rat brown adipocytes is larger than mice ( $P<0.002$ ) as expected, and that the number density ( $Q_A$ ) of brown adipocytes is smaller in rats compared to mice ( $P<0.01$ ). Considering lipid droplets, observer #1 reported that in rats they were larger ( $P<0.005$ ) and had a higher volume density ( $V_V$ ) than mice ( $P=0.035$ ), but observer #2 found the opposite for lipid droplet diameter ( $P=0.001$ ). White adipocytes were not found in the PVAT. Bland-Altman plots demonstrated agreement and reproducibility between observers since the means are close to the main difference (bias) and within the 95% limits of agreement. In conclusion, the methodology proposed can quantify morphological aspects of the aorta PVAT in rodents. It is reproducible and can be performed by both expert and inexperienced researchers, once they know how to recognize the structures of interest to be measured.*

**Key-words:** PVAT, aorta, quantification, morphology

## INTRODUCTION

Virtually all arteries, except brain arteries, are surrounded by a significant amount of perivascular adipose tissue (PVAT) (1). It was thought that the PVAT was only responsible for the mechanical protection of vessels against neighboring tissues during contraction (2). However, recent studies have shown that the PVAT is responsible for the mechanical support of blood vessels and the secretion of various substances. Among them, there are a large number of metabolically active adipokines, chemokines (e.g., interleukin-6 and tumor necrosis factor alpha), hormone-like factors (e.g., leptin, adiponectin, and resistin), and vasoactive substances (e.g., prostacyclin, adiponectin and prostaglandin) (3).

43 In rodents, the thoracic aorta PVAT consists of brown adipocytes that morphologically resemble the  
44 classic brown adipocytes found in interscapular brown adipose tissue (iBAT). The abdominal aorta  
45 PVAT is composed of a mixture of brown and white adipocytes, and the PVAT from other arteries  
46 such as mesentery, femoral and carotid arteries consists only of white adipocytes (4). In conditions  
47 such as obesity and diabetes, the PVAT becomes dysfunctional. It expands in size, accumulates  
48 inflammatory cells, and changes its secretory profile of several adipokines and proinflammatory  
49 cytokines (5).

50 Morphometry is a two-dimensional quantitative method, which aims to determine parameters such as  
51 lengths, perimeters, and areas. It can be easily performed using an appropriate image analysis software  
52 such as ImageJ (free, <https://imagej.nih.gov/ij/>) and Image Pro Plus (paid,  
53 <http://www.mediacy.com/imageproplus>). On the other hand, design-based stereology methods rely on  
54 statistical sampling principles and stochastic geometric theory to estimate quantitative parameters of  
55 three-dimension geometric objects in complex tissue structures (6, 7). Stereology uses test-system  
56 probes such as points, lines, and frames to estimate volumes, surfaces, lengths and numbers of the  
57 structure of interest. Stereology uses tissue sections that only show two-dimensional information and  
58 provides two- and three-dimensional information, whereas morphometry only makes assumptions in  
59 two-dimensions.

60 It is important to assess the morphological characteristics of PVAT by morphometric tools since this  
61 tissue has an active influence on vascular physiology and is considered a distinct tissue regarding  
62 anatomical location, histological characteristics and molecular biology (3). To date, there is no  
63 methodology published describing how to assess morphometric and stereological parameters of  
64 PVAT. Thus, our purpose is to provide some morphometric tools to study PVAT morphology. For  
65 this, we used the thoracic aorta PVAT of albino Wistar rats and C57BL/6 mice. Since rat and mice  
66 differ in body size, we expect that rat PVAT cells are larger than mice, and thus we tested whether the  
67 methodology proposed can detect differences between rats and mice. Also, the analyses were  
68 performed by two independent observers with and without previous experience in morphological  
69 quantification, to assess the impact of expertise on reproductivity.

70

## 71 **MATERIALS AND METHODS**

### 72 **PVAT collection and processing**

73 The handling and experimental protocols were approved by the local Ethics Committee to Care and  
74 Use of Laboratory Animals (CEUA#647/15). The study was performed in agreement with the Animal  
75 Research Reporting in Vivo Experiments ARRIVE guidelines and the Guideline for the Care and Use  
76 of Laboratory Animals (US NIH Publication N° 85-23. Revised 1996) (8). Male C57BL/6 mice (n=7)  
77 and male albino Wistar rats (n=6) with five months old were used. Animals were obtained from  
78 colonies maintained at the Federal Fluminense University Animal Care Facility and kept under  
79 standard conditions (12h light/dark cycles, 21±2°C, humidity 60±10% and air exhaustion cycle  
80 15min/h). Food and water were offered *ad libitum*, and the body mass was measured at the time of  
81 euthanasia. Average body mass was 433±21.4g for rats and 28±1.6g for mice.

82 For tissue collection, animals were submitted to six hours fasting and were deeply anesthetized with  
83 ketamine 100.0 mg/kg (Francotar®, Virbac, Brazil) and xylazine 10.0 mg/kg ip (Virbaxyl 2%®, Virbac,  
84 Brazil). The thoracic aorta was dissected, its proximal segment close to the aortic arc was immersed in  
85 Millong formalin (4% w/v in 0.1M phosphate buffer pH 7.2) for 48 hours, and then it followed the  
86 routine histological processing and embedding (Paraplast Plus, Sigma-Aldrich, St. Louis, MO, USA).  
87 Nonconsecutive sections were obtained to avoid counting the same structures (30 µm distance) and  
88 then stained with hematoxylin and eosin. Digital images of the PVAT were obtained using a Leica  
89 DM750 microscope (Wetzlar, German) coupled to a video camera Leica ICC50 HD (Wetzlar,  
90 German).

91

## 92 PVAT morphometry

93 Morphometry was performed in the computer-based software Image Pro<sup>®</sup> Plus v. 5.0 (Media  
94 Cybernetics, Silver Spring, MD, USA), which allows the counting, measurement, and classification of  
95 objects. Ten nonconsecutive images of the PVAT were acquired per animal (image resolution 2,048 x  
96 1,536 pixels .jpeg). Brown adipocytes have a polygonal shape and thus we measured the largest and  
97 smallest diameter of 10 cells per image using the line feature, summing 200 measurements from 100  
98 adipocytes (Fig. 1a). Since lipid droplets have a spherical shape, we used the circle feature on Image  
99 Pro Plus to measure their average diameter. Two random adipocytes per image had all their lipid  
100 droplets measured and thus 20 adipocytes were analyzed (Fig. 1b). Aorta wall was not evaluated in the  
101 present study since this methodology has been described elsewhere (9).

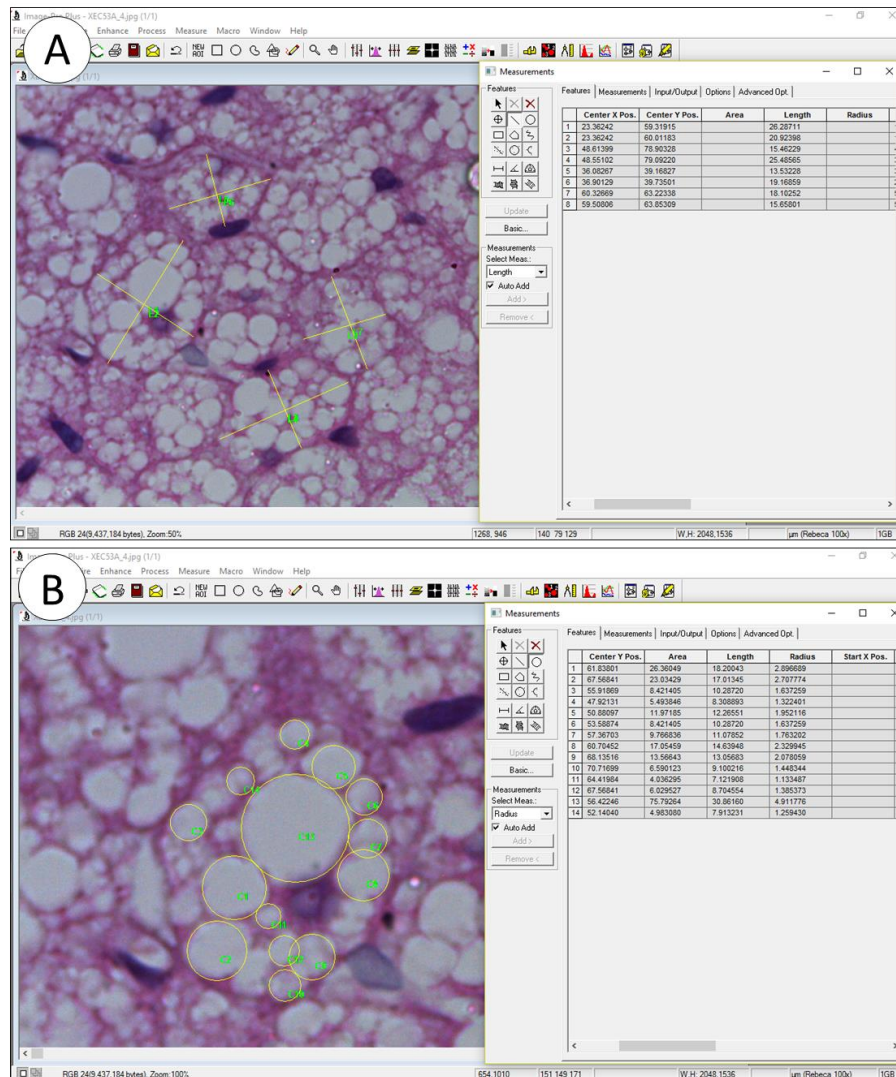

102

103 **Figure 1** – Morphometry performed on Image Pro Plus to assess diameter. A, brown adipocytes had their  
104 biggest and smallest diameter measured by the line feature. B, lipid droplets had their diameter measured by the  
105 circle feature. Images in A and B are the same, but the zoom in tool was used to allow a better visualization of  
106 the structures.

107

## 108 PVAT stereology

109 Stereology was performed in STEPanizer (<http://www.stepanizer.com/>), that is a free easy-to-use  
110 computer-based software tool for stereological assessment of digitally captured images (10). It creates  
111 test systems that are superimposed on digital images. Images can be scaled, and it has a counting  
112 module and an export function of data to spreadsheet programs. Monitor resolution was 768 x 1,024  
113 and images used for stereology were the same used for morphometry. The number density ( $Q_A$ ) of  
114 brown and paucilocular adipocytes was estimated in a test-frame of 2,966  $\mu\text{m}^2$  and a guard area of 150  
115 pixels width. All adipocytes inside the test-frame were considered but not the ones that hit the  
116 forbidden line or its extensions to avoid overestimation. The  $Q_A$  was calculated as the number of cells  
117 inside the test-frame divided by test-frame area, expressed in  $\text{mm}^2$ . Brown adipocytes were considered  
118 as the multilocular cells possessing lipid droplets of varied sizes and a central nucleus (when visible).  
119 Paucilocular adipocytes are cells with intermediate morphology between that of white and brown  
120 adipocytes, and they were considered as the multilocular cells possessing a single and pronounced  
121 central lipid droplet surrounded by small lipid droplets and a peripheral nucleus, when visible (11).  
122 White adipocyte where not present.

123 The volume density ( $V_V$ ) of lipid droplets was estimated by point counting in a 49-points test system  
124 and a guard area of 10 pixels width. The  $V_V[\text{lipid droplet}]$  was estimated as  $P_P[\text{lipid droplet}]/P_T$ , where  $P_P$  is the  
125 number of points that hit lipid droplets and  $P_T$  is the total test points, in this case, 49 (Fig. 2b). In  
126 general, counting 100-200 points per study subject is considered as a sufficient count when the  
127 structure of interest is representative, and to do additional sampling and counting would be inefficient  
128 because biological variation cannot be altered by more sampling and counting (12-14). In our  
129 experience, lipid droplets occupy about  $\frac{1}{3}$  to  $\frac{1}{4}$  of the tissue section and considering that we analyzed  
130 10 sections, a total of 490 points were used to estimate  $V_V[\text{lipid droplets}]$ , which would be appropriate.

131

132

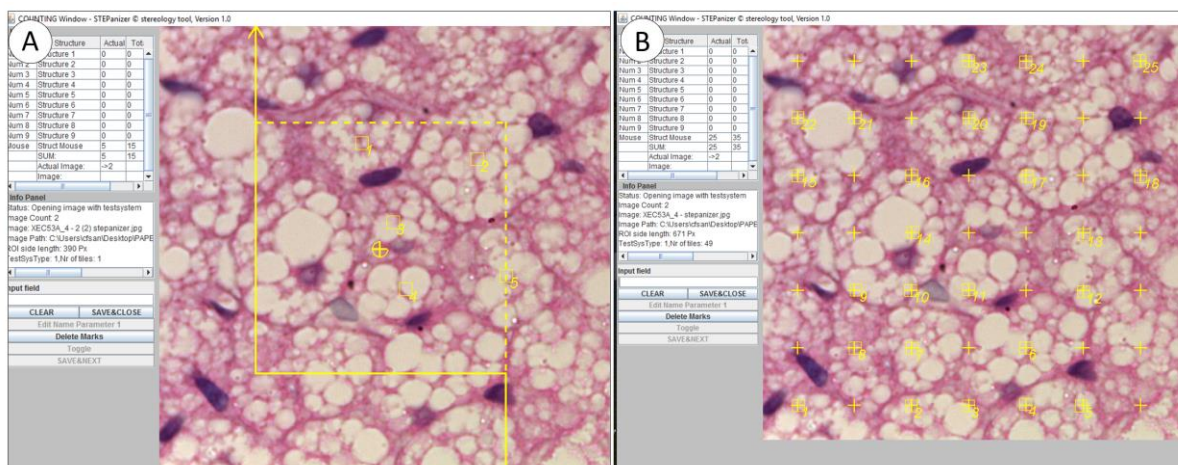

133

134 **Figure 2** – Stereology performed on STEPanizer to assessed number and volume densities. A, the number  
135 density ( $Q_A$ ) of brown adipocytes is estimated by counting the number of profiles inside the counting frame (in  
136 this example,  $n=5$ ). Cells that touch the forbidden line are not considered to avoid overestimation (continuous  
137 line). B, volume density ( $V_V$ ) of lipid droplets was estimated by point counting in a 49-points test system. Points  
138 that hits lipid droplet profiles are considered (in this example,  $n=25$ ).

139

140 **Observers**

141 All measurements were performed by two blind observers (#1 and #2), that used the same set of  
142 images, and analyzed them using their own computer, to assess the reproducibility of the method.  
143 Observer #1 had a previous experience performing morphological quantification of PVAT in Image  
144 Pro Plus and STEPanizer softwares, but observer #2 had no previous experience about morphological  
145 tools and softwares of tissue quantification. Before quantifying, a third researcher (senior advisor)  
146 helped the two observers to perform system calibration and discussed with them how to identify, count  
147 and measure the structures of interest.

148 **Statistics analysis**

149 Data are expressed as mean  $\pm$  standard deviation, and it was tested for normality and homoscedasticity  
150 of variances. Rat and mice parameters obtained from the same observer were compared with the  
151 Mann-Whitney U test. This test was also used to compare a similar parameter obtained by observers  
152 #1 and #2. Bland-Altman graphs were created to assess the agreement between the two observers. The  
153 difference between observer #2 and #1 (Obs2 - Obs1) was plotted against the average of each  
154 parameter. The bias of one observer to the other is represented by the mean of the differences and the  
155 95% limits of agreement (mean  $\pm$  2S.D.). Graph Pad® Prism v.6.0 (La Jolla, CA, USA) was used to  
156 perform all analysis and a  $P < 0.05$  was considered statistically significant.

157

158 **RESULTS**

159 **PVAT quantification**

160 Table 1 shows the morphometric and stereological parameters obtained by observers #1 and #2 using  
161 the same set of images acquired from mice and rat PVAT. For morphometry, observers #1 and #2  
162 found that brown adipocytes of rats are larger than mice (+26%  $P=0.0023$ , +18%  $P=0.0047$ ,  
163 respectively). However, whereas observer #1 found lipid droplets larger in rats compared to mice  
164 (+16%  $P=0.0047$ ), observer #2 found the opposite (-19%  $P=0.0012$ ). This difference between  
165 observers seems to be related to the quantification of rat lipid droplet diameter since average mice  
166 lipid droplet diameter was similar between observers.

167 For stereology, both observers detected a smaller number density of brown adipocytes in rats  
168 compared to mice (+24%  $P=0.0134$ , +23%  $P=0.0041$ , respectively), and the same is true for  
169 paucilocular adipocytes (+1,077%  $P=0.0052$ , +550%  $P=0.0256$ , respectively). Observer #1 showed a  
170 higher volume density of lipid droplets in rats (+38%  $P=0.035$ ), but observer #2 found only a small  
171 trend with no significance. It is important to notice that the coefficient of variation is low for most  
172 parameters analyzed, but not for  $Q_A[\text{paucilocular adipocytes}]$  and  $V_V[\text{lipid droplets}]$ .

173

174

175 Table 1 – Comparison between observer #1 and observer #2

| Animal Model          | Parameter                                  | Observer #1   |            | Observer #2    |        | P     |
|-----------------------|--------------------------------------------|---------------|------------|----------------|--------|-------|
|                       |                                            | Mean ± S.D.   | CV (%)     | Mean ± S.D.    | CV (%) |       |
| C57BL/6 Mouse         | <b>Morphometry</b>                         |               |            |                |        |       |
|                       | Brown adipocyte, $\mu\text{m}$             | 16.1 ± 1.6    | 9.7        | 16.0 ± 1.3     | 8.2    | NS    |
|                       | Lipid droplet <sup>#</sup> , $\mu\text{m}$ | 2.1 ± 0.1     | 4.8        | 2.1 ± 0.1      | 5.6    | NS    |
|                       | <b>Stereology</b>                          |               |            |                |        |       |
|                       | Number density, $Q_A$                      |               |            |                |        |       |
|                       | Brown adipocyte, 1/mm <sup>2</sup>         | 438.5 ± 56.9  | 13.0       | 442.8 ± 46.7   | 10.5   | NS    |
|                       | Paucilocular adipocyte, 1/mm <sup>2</sup>  | 1.75 ± 3.0    | 171.8      | 2.23 ± 2.9     | 132.3  | NS    |
| Volume density, $V_V$ |                                            |               |            |                |        |       |
| Lipid droplet, %      | 25.8 ± 5.7                                 | 22.1          | 22.0 ± 6.5 | 29.5           | NS     |       |
| Albino Rat            | <b>Morphometry</b>                         |               |            |                |        |       |
|                       | Brown adipocyte, $\mu\text{m}$             | 20.3 ± 1.3**  | 6.5        | 19.0 ± 1.8**   | 9.5    | NS    |
|                       | Lipid droplet <sup>#</sup> , $\mu\text{m}$ | 2.44 ± 0.4**  | 15.8       | 1.69 ± 0.1**   | 7.3    | 0.002 |
|                       | <b>Stereology</b>                          |               |            |                |        |       |
|                       | Number density, $Q_A$                      |               |            |                |        |       |
|                       | Brown adipocyte, 1/mm <sup>2</sup>         | 333.2 ± 45.5* | 13.7       | 341.0 ± 45.8** | 13.4   | NS    |
|                       | Paucilocular adipocyte, 1/mm <sup>2</sup>  | 20.6 ± 15.7** | 76.3       | 14.5 ± 10.5*   | 72.5   | NS    |
| Volume density, $V_V$ |                                            |               |            |                |        |       |
| Lipid droplet, %      | 35.6 ± 6.4*                                | 18.0          | 29.5 ± 8.4 | 28.4           | NS     |       |

176 # brown adipocytes only

177 \*  $P < 0.05$ ; \*\*  $P < 0.01$ ; \*\*\*  $P < 0.001$  rat vs. mouse from the same observer

178 P indicated in the last column refers to a difference between observers #1 and #2

179

180

181 Overall morphological findings are summarized in Fig 3, where rats display larger brown adipocytes  
 182 with larger lipid droplets compared to mice. Therefore, in rats, fewer cells are found per area ( $Q_{A[\text{brown}]}$   
 183  $[\text{adipocyte}]$  rat < mice) and lipid droplets occupy a bigger volume within tissue section ( $V_{V[\text{lipid droplets}]}$  rat >  
 184 mice).

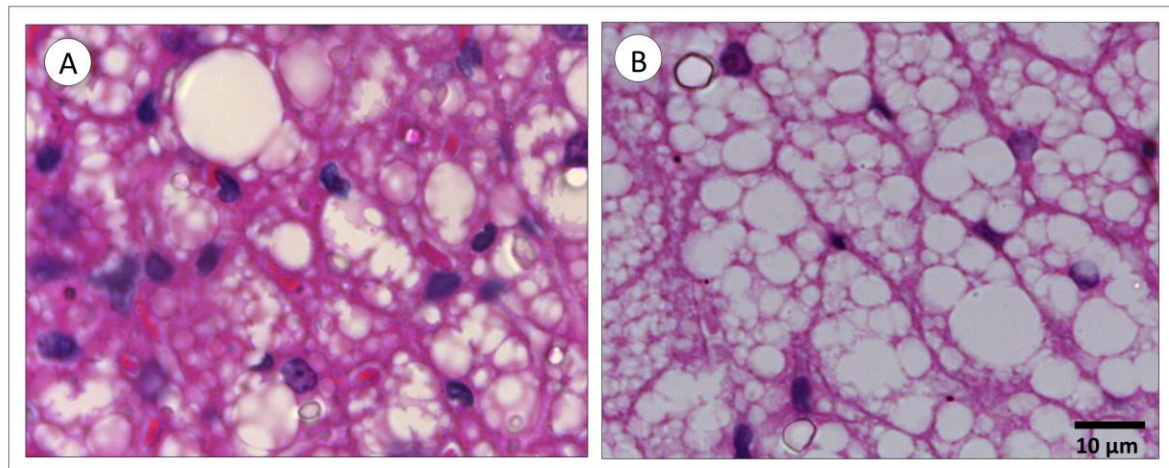

185

186 **Figure 3** – Perivascular adipose tissue from mice (A) and rat (B). In rats, brown adipocytes and lipid droplets are  
 187 larger than mice. As a consequence, the number density ( $Q_A$ ) of brown adipocytes in rats is smaller, and the  
 188 volume density ( $V_V$ ) of lipid droplets is bigger than mice.

189

190 **Inter-observer agreement and reproducibility**

191 Bland-Altman test parameters are shown in Table 2. Curves in Figs 4-5 have plotted the average of  
 192 mice plus rat parameters (x-axis) against the difference between observer #1 and #2 (y-axis). An  
 193 overall analysis of the five curves shows that morphometric (Fig 4) and stereological (Fig 5)  
 194 quantification agreed among observers. However, in Fig 4b the data close to 0.0 regarding obs2-obs1  
 195 are from rats, whereas all mice data are negatives, which increases the bias and the 95% confidence  
 196 interval. When analyzed independently, the average lipid droplet diameter bias ( $\pm$ S.D) for rats is  
 197  $0.046\pm 0.06$  and for mice  $-0.624\pm 0.46$  (data not shown). Also, most positive data plotted in Fig 5a are  
 198 from mice, and thus observer #2 found values bigger than observer #1 for the same animal.

199

200

201 Table 2 – Reproducibility between observers evaluated by the Bland-Altman test

| Parameter                                  | Bias    | SD Bias | Limits of agreement |            |
|--------------------------------------------|---------|---------|---------------------|------------|
|                                            |         |         | Lower (CI)          | Upper (CI) |
| <b>Morphometry</b>                         |         |         |                     |            |
| Brown adipocyte, $\mu\text{m}$             | -0.6723 | 1.259   | -3.140              | 1.795      |
| Lipid droplet <sup>#</sup> , $\mu\text{m}$ | -0.3152 | 0.476   | -1.248              | 0.618      |
| <b>Stereology</b>                          |         |         |                     |            |
| Number density, $Q_A$                      |         |         |                     |            |
| Brown adipocyte, $1/\text{mm}^2$           | 5.900   | 11.60   | -16.84              | 28.64      |
| Paucilocular adipocyte, $1/\text{mm}^2$    | -2.566  | 6.968   | -16.22              | 11.09      |
| Volume density, $V_V$                      |         |         |                     |            |
| Lipid droplet, %                           | -4.908  | 3.329   | -11.43              | 1.616      |

202 CI, 95% confidence interval  
 203 # only from brown adipocytes

204  
 205

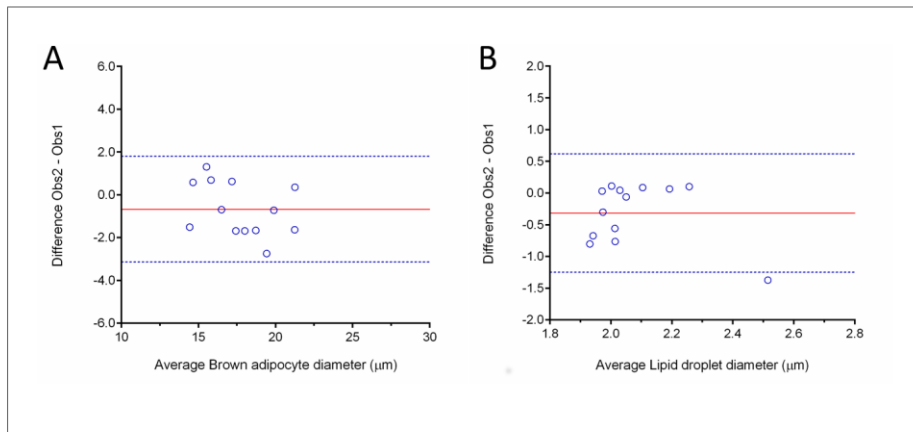

206

207 **Figure 4** – Morphometry reproducibility between observers assessed by the Bland-Altman method. Graphs plot  
 208 the difference between observers (Obs2-Obs1) against the mean ( $[\text{Obs1}+\text{Obs2}]/2$ ). Brown adipocyte diameter is  
 209 shown in **A** and lipid droplet diameter in **B**.

210

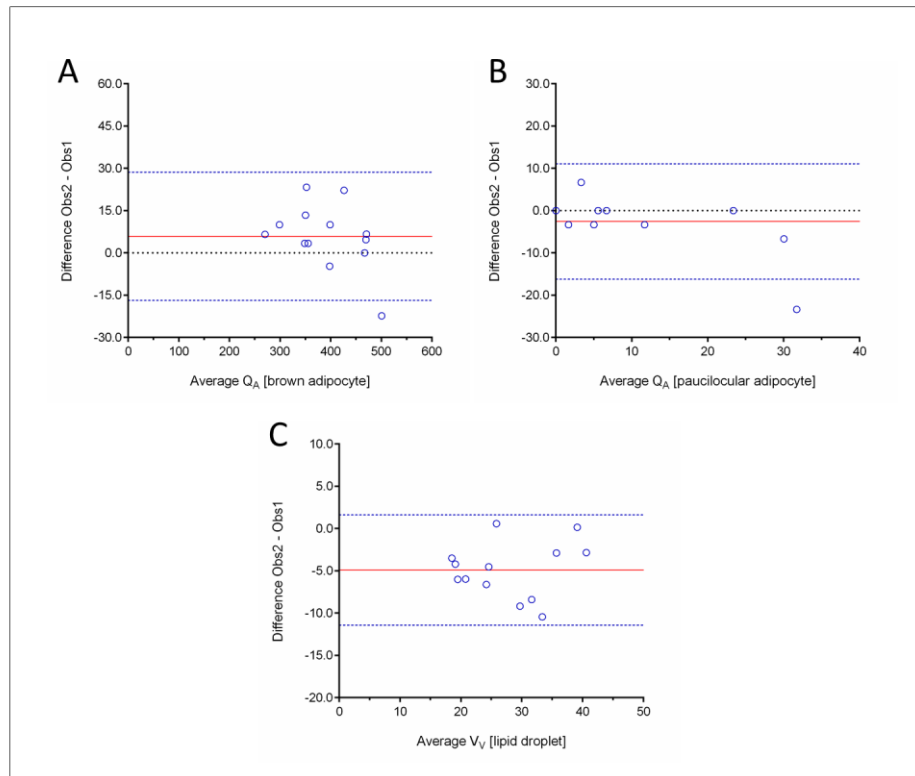

211  
212 **Figure 5** – Stereology reproducibility between observers assessed by the Bland-Altman method. Graphs plot the  
213 difference between observers (Obs2-Obs1) against the mean ( $(\text{Obs1}+\text{Obs2})/2$ ). **A**, number density ( $Q_A$ ) of brown  
214 adipocytes. **B**,  $Q_A$  of paucilocular adipocytes. **C**, volume density ( $V_V$ ) of lipid droplets (brown adipocytes only).

215

216

## 217 DISCUSSION

218 We provided some morphometric and stereological tools to allow the study of PVAT morphology in  
219 rodents. Morphometry is a quantitative method that can be used to determine lengths, perimeters and  
220 areas of biological specimens in two-dimension, whereas stereology estimates volumes, surfaces,  
221 lengths and numbers of structures in tissue sections that only provides two-dimensional information,  
222 providing two-and three-dimensional information. The methodology presented can detect  
223 morphological differences among the PVAT of albino Wistar rats and C57BL/6 mice, such as the  
224 average size of brown adipocytes and their lipid content. These parameters are extremely important  
225 since they can be used to understand PVAT remodeling in obesity by using animal models such as  
226 diet-induced obesity and genetic models of obesity. Assessing aorta and its PVAT remodeling,  
227 together with gene expression and functional approaches will allow the understand of mechanisms  
228 underlying arterial dysfunction in obesity. This integrated technique approach to exploit vascular  
229 biology will help to elucidate the onset and development of vascular dysfunction in obesity.

230 Morphometry and stereology are considered distinct quantitative methods. They possess several  
231 peculiarities, different purposes and are executed by specific image analysis software. Despite their  
232 inherent methodological differences, the data generated have good reproducibility. These  
233 methodologies allow inter-group comparisons, and their theoretical background is well established and  
234 accepted. Of note, only a small training is required so that inexperienced researchers not habituated  
235 with the methodology can easily perform it (6). In the present study, morphometry and stereology data  
236 obtained by the two observers agreed, which ratifies that even inexperienced researchers can perform  
237 the methodology and obtain reproductive data.



238 Observers #1 and #2 did not have difficult to execute the methodologies proposed, but observer #2  
239 (inexperienced) reported some difficult to identify lipid droplet boundary in the images provided. It  
240 might justify the inter-observer difference found for rat lipid droplet diameter, and an absence of  
241 difference in the volume density of lipid droplets between rats and mice for observer #2. Digital  
242 images were obtained using the 100x objective of an optical microscope, that is the highest  
243 magnification possible in this system. An alternative to lipid droplet quantification might be the use of  
244 electron photomicrography since they provide a higher magnification, allowing a better visualization  
245 of tissue organelles and their boundaries. However, it is an expensive technique, and not all  
246 laboratories perform it as a routine. Despite this limitation, the Bland-Altman data reported agreement  
247 and reproducibility between observers.

248 The body has two types of adipose tissues, the white (WAT) and brown adipose tissue (BAT). WAT is  
249 important for energy storage, and it is capable of rapidly increasing its size by adipocyte hypertrophy  
250 and hyperplasia. WAT depots are found surrounding internal organs (visceral fat) and under the skin  
251 (subcutaneous fat), and visceral fat expansion in obesity is associated with increased cardiovascular  
252 risk (15, 16). BAT is responsible for adaptive thermogenesis, being consistently identified in adult  
253 humans in the cervical-supraclavicular, perirenal, adrenal, paravertebral and surrounding large vessels  
254 as PVAT (15). In some individuals, brown adipocytes are also found within the WAT depot and are  
255 referred to as beige adipocytes (17, 18). Since brown adipocytes burn fat, several strategies are under  
256 investigation to increase the number and activity of beige cells as an attempt to induce weight loss,  
257 improve metabolism, and reduce cardiovascular risk (19-21).

258 White adipocytes are spherical cells with ~90% of their volume comprising a single cytoplasmic lipid  
259 droplet and a peripheric nucleus, whereas brown adipocytes are polygonal cells with a roundish  
260 nucleus and have several cytoplasmic lipid droplets (11, 19, 22). The paucilocular adipocyte is  
261 considered as an intermediate step of white-to-brown adipocyte transdifferentiation. Consequently, it  
262 presents an intermediate morphology between white and brown adipocytes, exhibiting a large vacuole  
263 surrounded by at least five small lipid droplets (11, 23, 24). Paucilocular adipocytes are found in all  
264 adipose tissue deposits in humans and rodents (25). In our study, we noticed paucilocular adipocytes  
265 in rats and mice thoracic aorta PVAT, but not in all animals, and they were more often seen in rats  
266 compared to mice. The high coefficient of variance for  $Q_{A[\text{paucilocular adipocyte}]}$  indicates that the  
267 paucilocular adipocyte is not a frequent cell in the thoracic aorta PVAT of male albino Wistar rats and  
268 C57BL/6 mice. Thus, if the researcher has the aim to evaluate this subtype of adipocyte, more tissue  
269 sections are necessary to obtain an unbiased estimation of its numerical density.

270

## 271 CONCLUSIONS

272 In conclusion, the methodology proposed can quantify morphological aspects of the aorta PVAT in  
273 rodents. It is reproducible and can be performed by both expert and inexperienced researchers, once  
274 they know how to recognize the structures of interest to be measured.

275

## 276 ACKNOWLEDGEMENTS

277 Authors are thankful for Dilliane da Paixão Rodrigues Almeida for her technical assistance.

278

## 279 AUTHORSHIP

280 Fernandes-Santos C conceived and designed the experiments; Carneiro FD and Mello SCS performed  
281 the experiments; Fernandes-Santos C analyzed and interpreted the data; Marques EB, Barros RBM,  
282 and Scaramello CBV contributed with reagents, materials, and animals; Carneiro FD and Fernandes-  
283 Santos C wrote the paper

284

285 **REFERENCES**

- 286 1. Police SB, Thatcher SE, Charnigo R, Daugherty A, Cassis LA. Obesity promotes inflammation  
287 in periaortic adipose tissue and angiotensin II-induced abdominal aortic aneurysm formation.  
288 *Arterioscler Thromb Vasc Biol.* 2009;29(10):1458-64.
- 289 2. Szasz T, Webb RC. Perivascular adipose tissue: more than just structural support. *Clin Sci*  
290 (Lond). 2012;122(1):1-12.
- 291 3. Chang L, Milton H, Eitzman DT, Chen YE. Paradoxical roles of perivascular adipose tissue in  
292 atherosclerosis and hypertension. *Circ J.* 2013;77(1):11-8.
- 293 4. Brown NK, Zhou Z, Zhang J, Zeng R, Wu J, Eitzman DT, et al. Perivascular adipose tissue in  
294 vascular function and disease: a review of current research and animal models. *Arterioscler*  
295 *Thromb Vasc Biol.* 2014;34(8):1621-30.
- 296 5. Calabro P, Yeh ET. Obesity, inflammation, and vascular disease: the role of the adipose tissue  
297 as an endocrine organ. *Subcell Biochem.* 2007;42:63-91.
- 298 6. Mandarim-de-Lacerda CA, Fernandes-Santos C, Aguila MB. Image analysis and quantitative  
299 morphology. *Methods Mol Biol.* 2010;611:211-25.
- 300 7. Van Vré EA, van Beusekom HM, Vrints CJ, Bosmans JM, Bult H, Van der Giessen WJ.  
301 Stereology: a simplified and more time-efficient method than planimetry for the quantitative  
302 analysis of vascular structures in different models of intimal thickening. *Cardiovasc Pathol.*  
303 2007;16(1):43-50.
- 304 8. Kilkeny C, Browne WJ, Cuthill IC, Emerson M, Altman DG. Improving bioscience research  
305 reporting: the ARRIVE guidelines for reporting animal research. *PLoS Biol.*  
306 2010;8(6):e1000412.
- 307 9. Fernandes-Santos C, Mendonca L de S, Mandarim-de-Lacerda A. Favorable cardiac and aortic  
308 remodeling in olmesartan-treated spontaneously hypertensive rats. *Heart Vessels.* 2009.
- 309 10. Tschanz SA, Burri PH, Weibel ER. A simple tool for stereological assessment of digital  
310 images: the STEPanizer. *J Microsc.* 2011;243(1):47-59.
- 311 11. Cinti S. The adipose organ at a glance. *Dis Model Mech.* 2012;5(5):588-94.
- 312 12. Gundersen HJG, Osterby R. Optimizing sampling efficiency of stereological studies in biology:  
313 or 'do more less well!'. *J Microsc.* 1981;121(Pt 1):65-73.
- 314 13. Gundersen HJ, Jensen EB. The efficiency of systematic sampling in stereology and its  
315 prediction. *J Microsc.* 1987;147(Pt 3):229-63.
- 316 14. Gundersen HJ, Jensen EB, Kiêu K, Nielsen J. The efficiency of systematic sampling in  
317 stereology--reconsidered. *J Microsc.* 1999;193(Pt 3):199-211.
- 318 15. Park A, Kim WK, Bae KH. Distinction of white, beige and brown adipocytes derived from  
319 mesenchymal stem cells. *World J Stem Cells.* 2014;6(1):33-42.
- 320 16. Ibrahim MM. Subcutaneous and visceral adipose tissue: structural and functional differences.  
321 *Obes Rev.* 2010;11(1):11-8.
- 322 17. Ishibashi J, Seale P. Medicine. Beige can be slimming. *Science.* 2010;328(5982):1113-4.
- 323 18. Wu J, Boström P, Sparks LM, Ye L, Choi JH, Giang AH, et al. Beige adipocytes are a distinct  
324 type of thermogenic fat cell in mouse and human. *Cell.* 2012;150(2):366-76.
- 325 19. Cypess AM, Lehman S, Williams G, Tal I, Rodman D, Goldfine AB, et al. Identification and  
326 importance of brown adipose tissue in adult humans. *N Engl J Med.* 2009;360(15):1509-17.
- 327 20. Lidell ME, Enerback S. Brown adipose tissue--a new role in humans? *Nat Rev Endocrinol.*  
328 2010;6(6):319-25.

- 329 21. Mattson MP. Perspective: Does brown fat protect against diseases of aging? *Ageing Res Rev.*  
330 2010;9(1):69-76.
- 331 22. Nedergaard J, Bengtsson T, Cannon B. Unexpected evidence for active brown adipose tissue in  
332 adult humans. *Am J Physiol Endocrinol Metab.* 2007;293(2):E444-52.
- 333 23. Cinti S. Transdifferentiation properties of adipocytes in the adipose organ. *Am J Physiol*  
334 *Endocrinol Metab.* 2009;297(5):E977-86.
- 335 24. Barbatelli G, Murano I, Madsen L, Hao Q, Jimenez M, Kristiansen K, et al. The emergence of  
336 cold-induced brown adipocytes in mouse white fat depots is determined predominantly by  
337 white to brown adipocyte transdifferentiation. *Am J Physiol Endocrinol Metab.*  
338 2010;298(6):E1244-53.
- 339 25. Giordano A, Smorlesi A, Frontini A, Barbatelli G, Cinti S. White, brown and pink adipocytes:  
340 the extraordinary plasticity of the adipose organ. *Eur J Endocrinol.* 2014;170(5):R159-71.
